# Supplementary material for: Interpretable survival prediction for colorectal cancer using deep learning
Source: Springer Nature journal article supplement (doi:10.1038/s41746-021-00427-2), 2021-04-19
Supplement: 41746_2021_427_MOESM4_ESM.pdf [file 41746_2021_427_MOESM4_ESM.pdf]

# Supplementary Material

## Supplementary Data 1

Zip file containing 2 PNG files, one containing 25 tumor-adipose feature (TAF) patches closest to the centroids, and one containing 25 randomly-sampled TAF patches, used for human graders as learning material to identify TAF (see “Tumor-adipose Feature” section in Methods).

## Supplementary Data 2

Zip file containing 2 PDF files, one containing 25 TAF patches, and one containing 25 non-TAF patches, used for human graders to practice identifying TAF (see “Tumor-adipose Feature” section in Methods). Patches were presented to human graders in a random order.

## Supplementary Data 3

Zip file containing 2 PDF files, one containing 100 TAF patches, and one containing 100 non-TAF patches, used for human graders to evaluate their ability to identify TAF (see “Tumor-adipose Feature” section in Methods). Patches were presented to human graders in a random order.

# Supplementary Figures

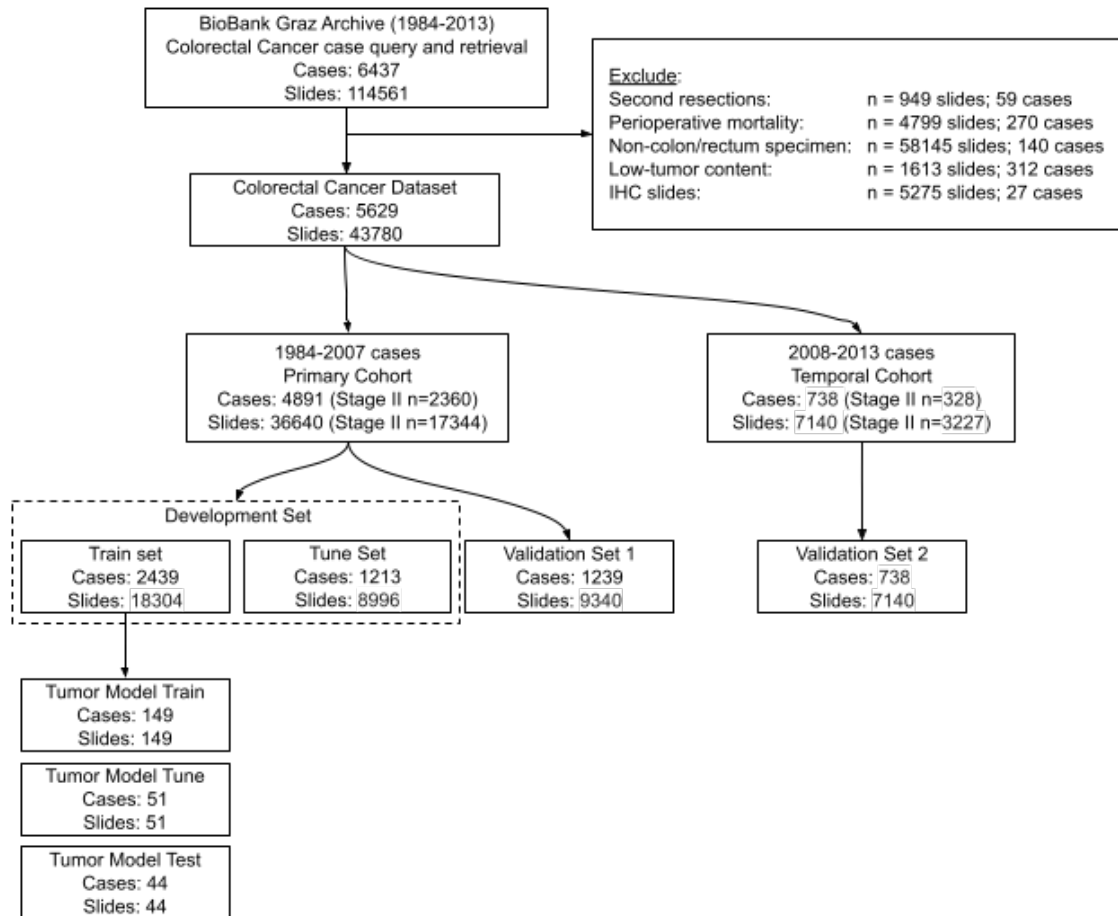

Supplementary Figure 1. STARD diagram of the dataset curation process.

## Deep Learning System

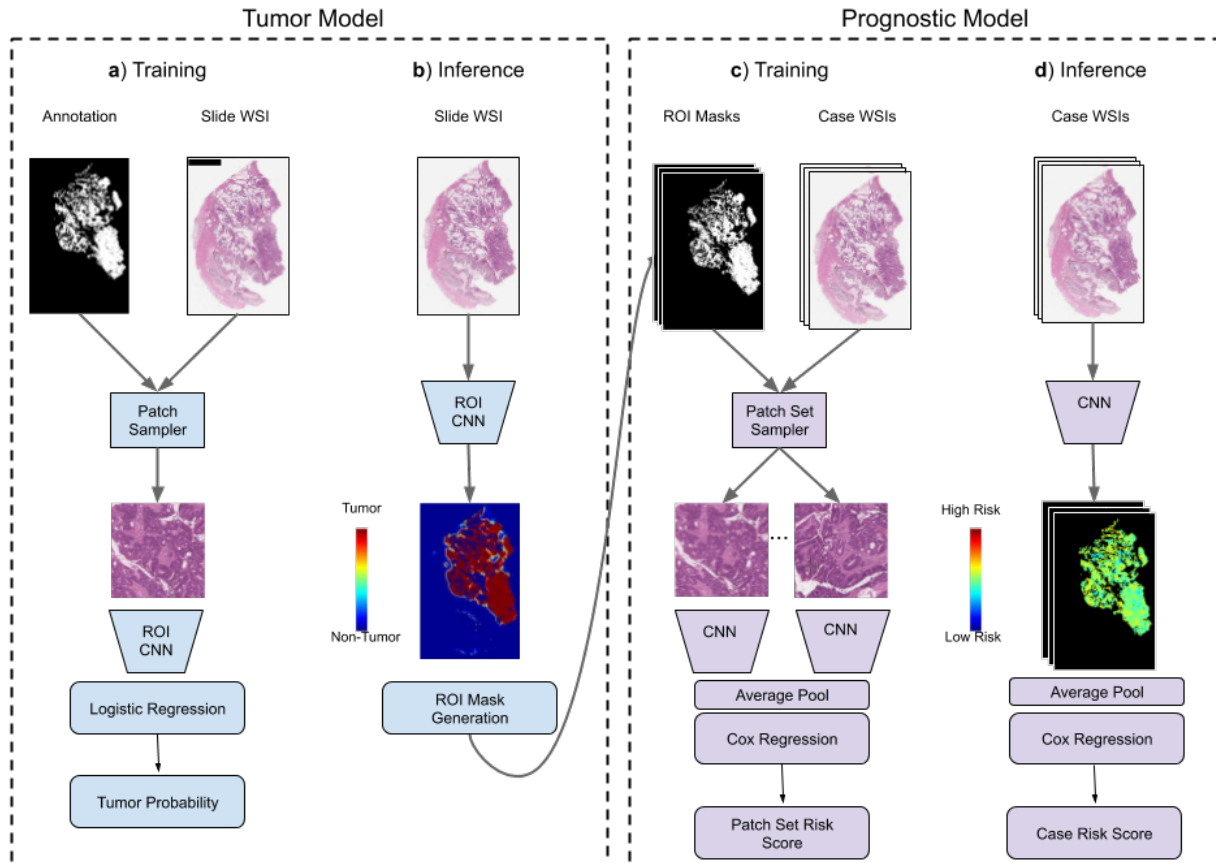

**Supplementary Figure 2. Overview of deep learning system (DLS) development.** (a) tumor model development: the tumor model was trained at the patch-level to identify colorectal adenocarcinoma from pixel-level pathologist annotations. (b) tumor model inference: the tumor model was run over all slides to produce region of interest (ROI) heatmaps that were binarized to generate ROI masks. (c) prognostic model development: The model was trained to predict case-level disease-specific survival. During training, a case is approximated by sampling a small number of patches from across the ROIs in a case. (d) prognostic model inference: at inference time, the prognostic model was run exhaustively across all ROIs to produce a case-level risk score. Scale bar indicates 5 mm. Note that the patch sampler’s output image patches are shown for illustrative purposes only; the actual patch sizes will vary depending on the magnification (Supplementary Tables 8 and 10).

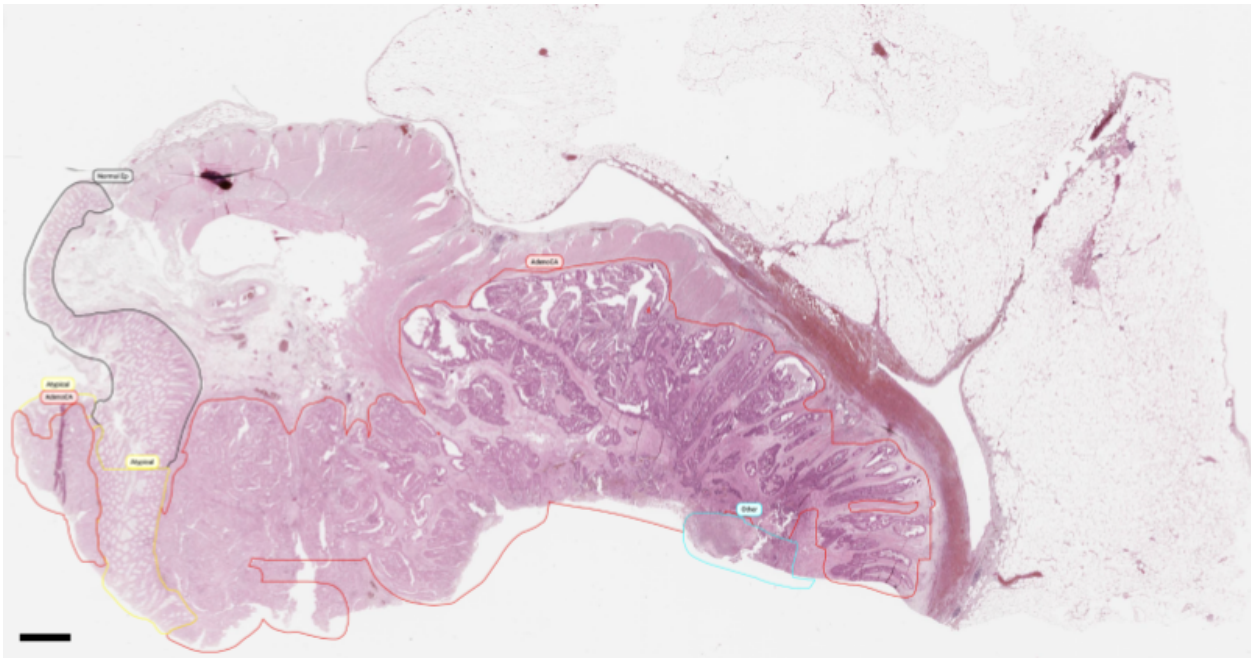

**Supplementary Figure 3. Example of slide annotations for tumor model development.**

Annotations were provided for multiple types of histologies (e.g. normal epithelium, adenocarcinoma, atypical, and “other”). The model was developed to differentiate between colon adenocarcinoma and all other classes. Scale bar indicates 1 mm.

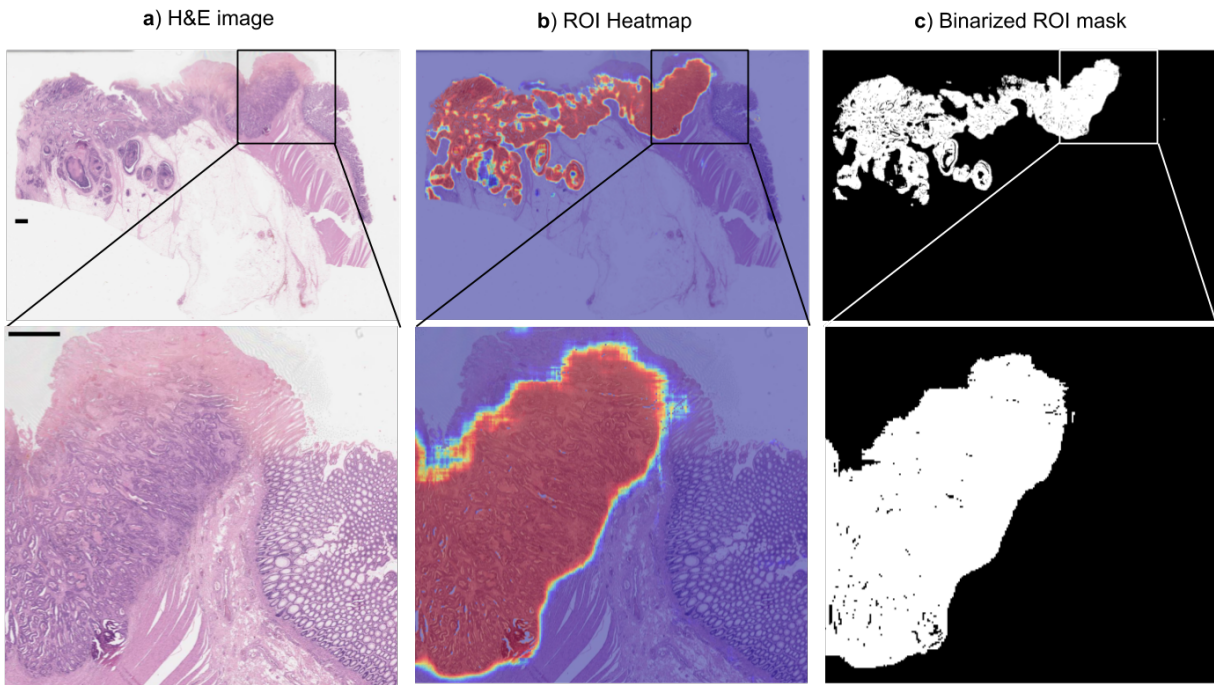

**Supplementary Figure 4. Sample tumor segmentation model predictions and derived binary ROI mask that is used to sample image patches for the prognostic model. Scale bars indicate 1 mm.**

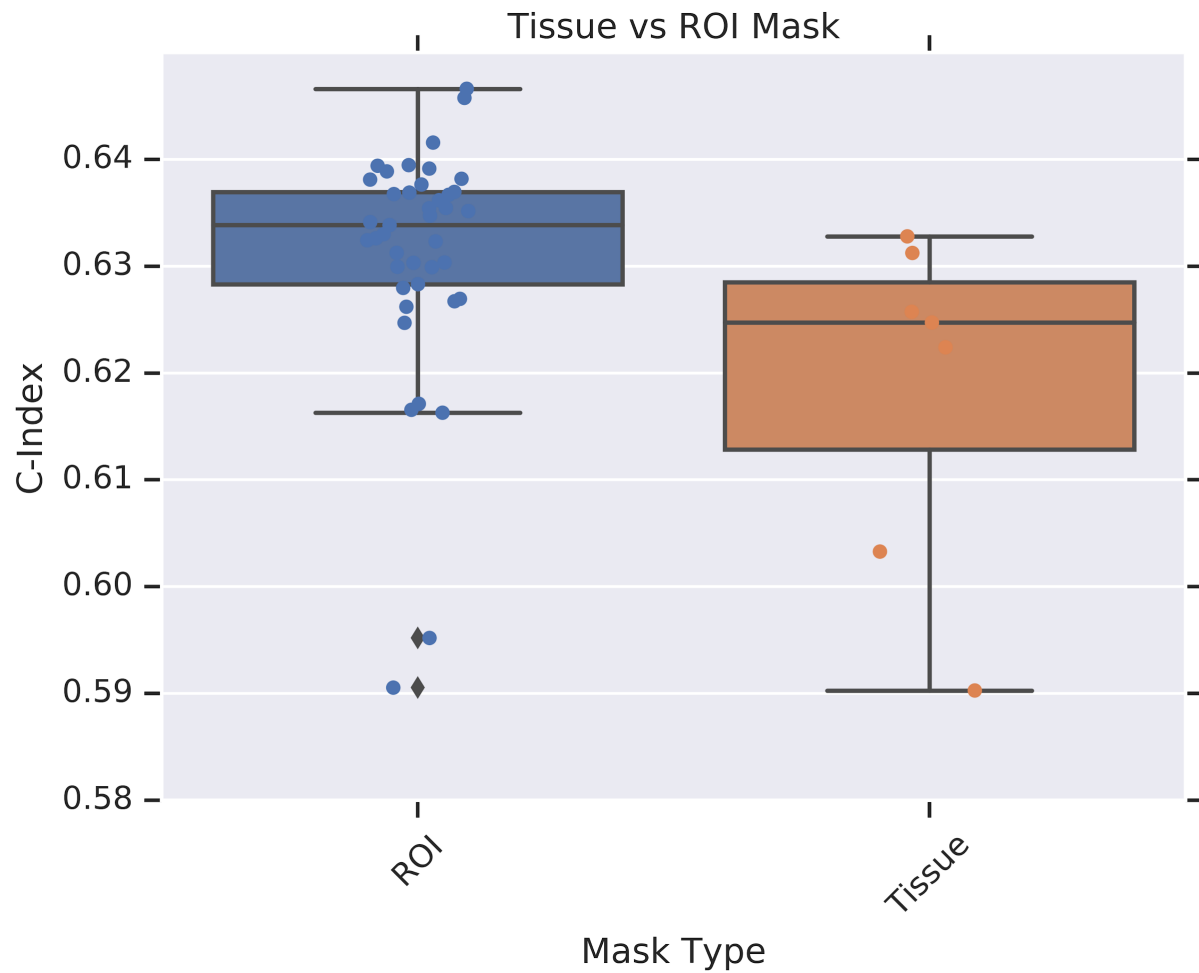

**Supplementary Figure 5. Comparison of training using the entire tissue versus on a region of interest (ROI) derived using the tumor segmentation model.** Variation in these box plots stems from different learning rates for both types of models and different mask generation parameters for the models trained on ROI masks. Models were evaluated on the tune set. Edges of boxes indicate quartiles, whiskers represent the ranges, and outliers are defined by 1.5 times the interquartile range.

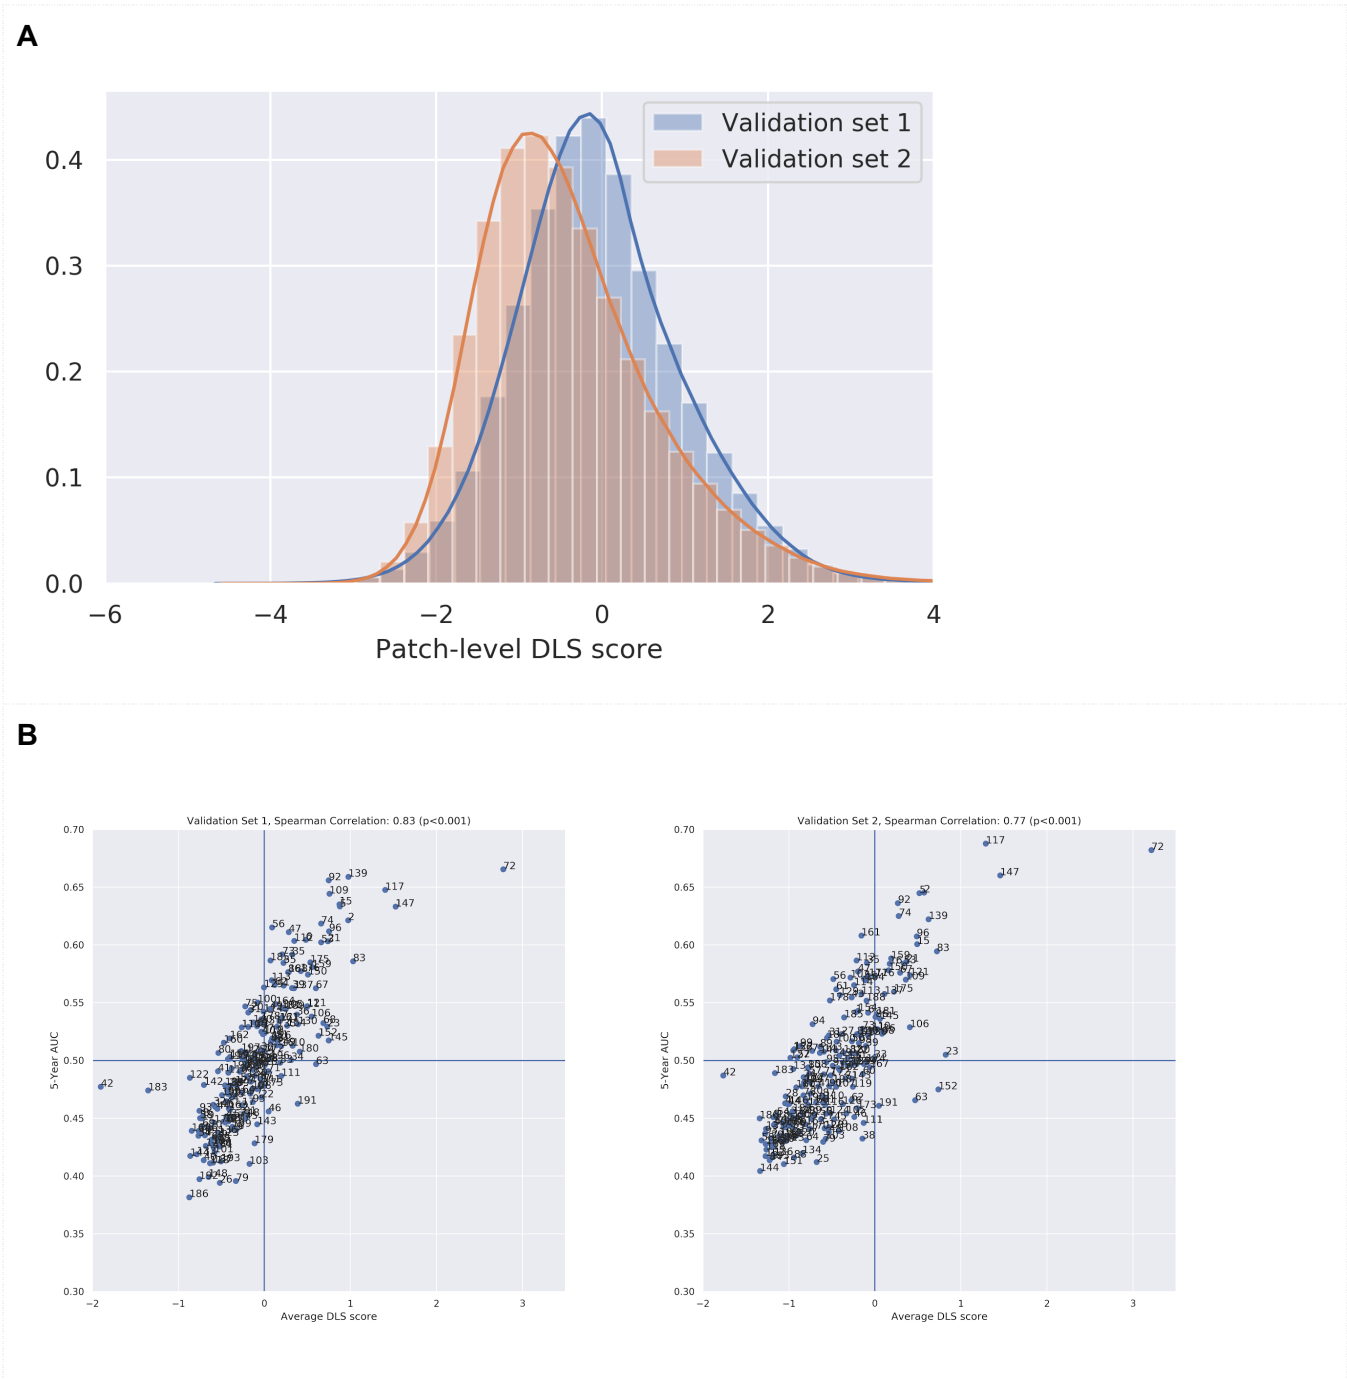

**Supplementary Figure 6. Patch-level DLS score distribution for (A) all patches and (B) for each cluster. See also Supplementary Table 1 for comparison of clinicopathologic characteristics in validation set 1 and 2. Panel B additionally compares the average DLS score distribution with the 5-year AUC.**

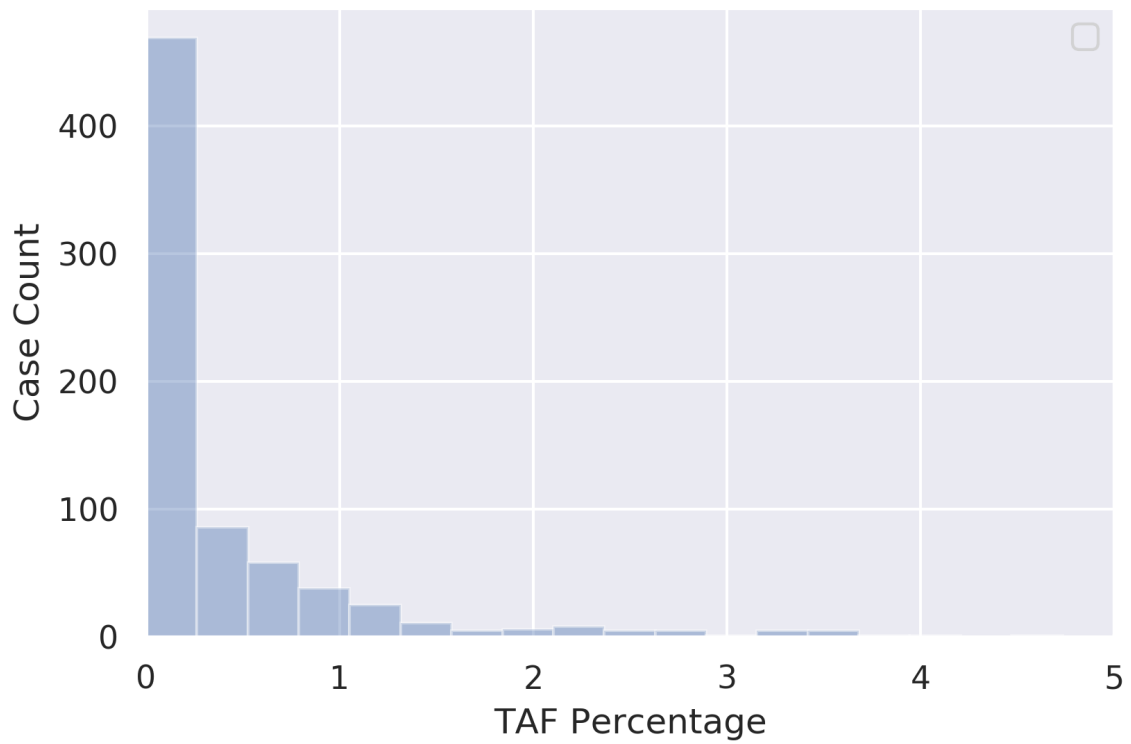

**Supplementary Figure 7. Histogram of the percentage of the region of interest that is composed of the tumor-adipose feature (TAF) in validation set 2.**



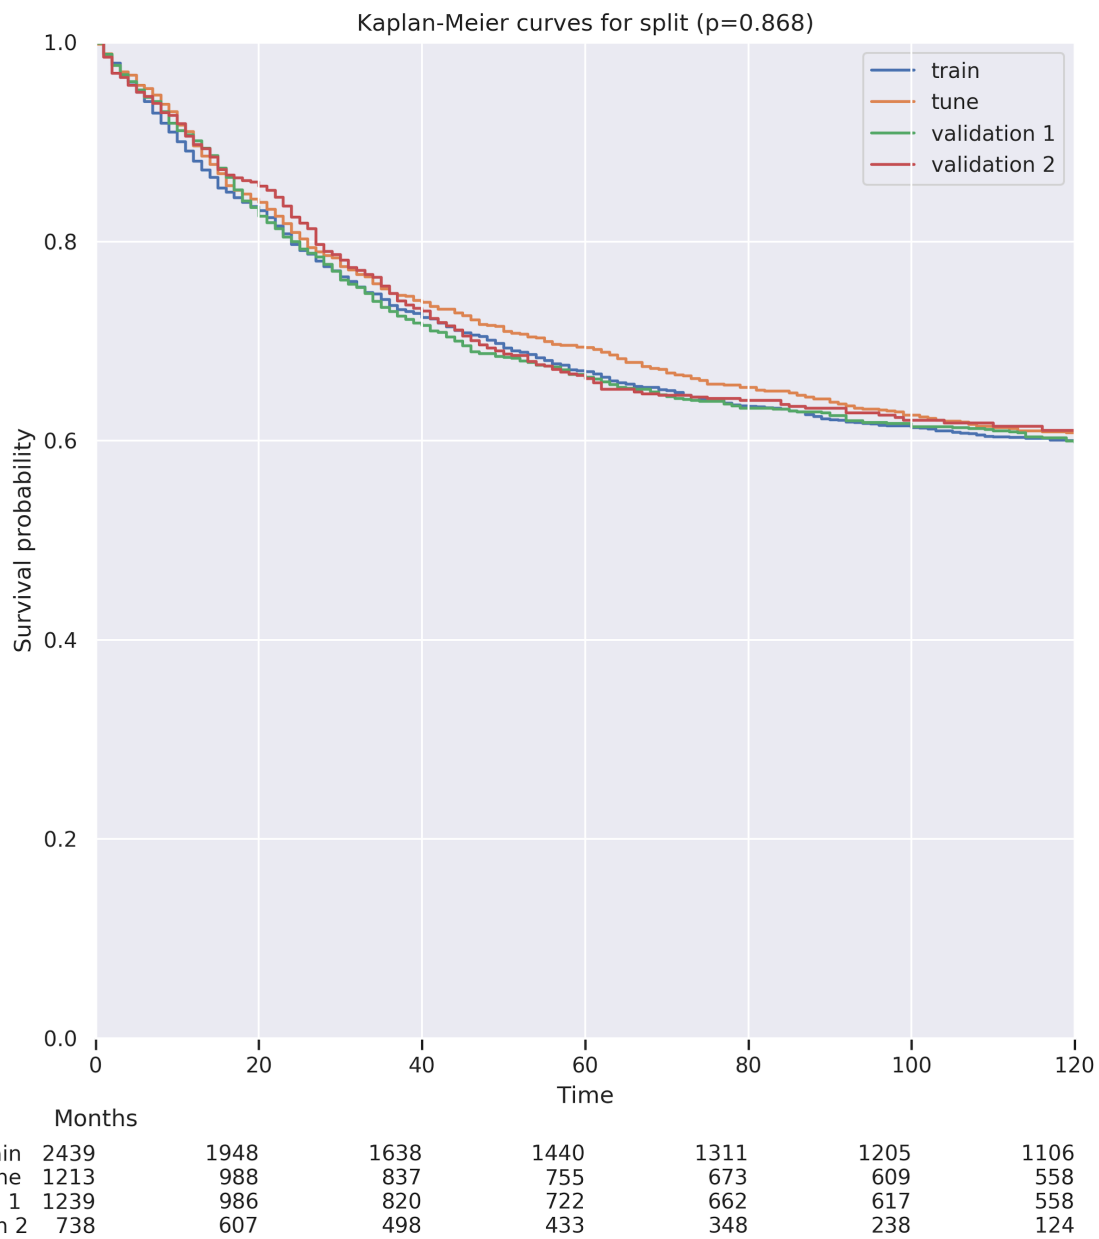

**Supplementary Figure 8. Kaplan Meier curves for all cases in the train, tune, and validation sets.**

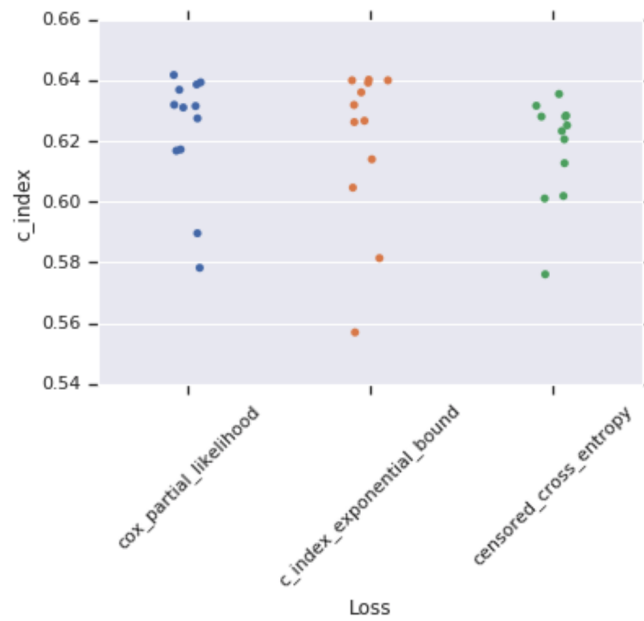

**Supplementary Figure 9. Comparison of loss functions for DLS training.** We compared three loss functions for DLS training: Cox partial likelihood, exponential lower bound on concordance index, and censored cross-entropy. For each loss function, 3 batch sizes (64, 128, 256) and 4 learning rates (10e-3, 5e-4, 10e-4, 5e-5, 10e-5) were tried. Models were evaluated on the tune set.

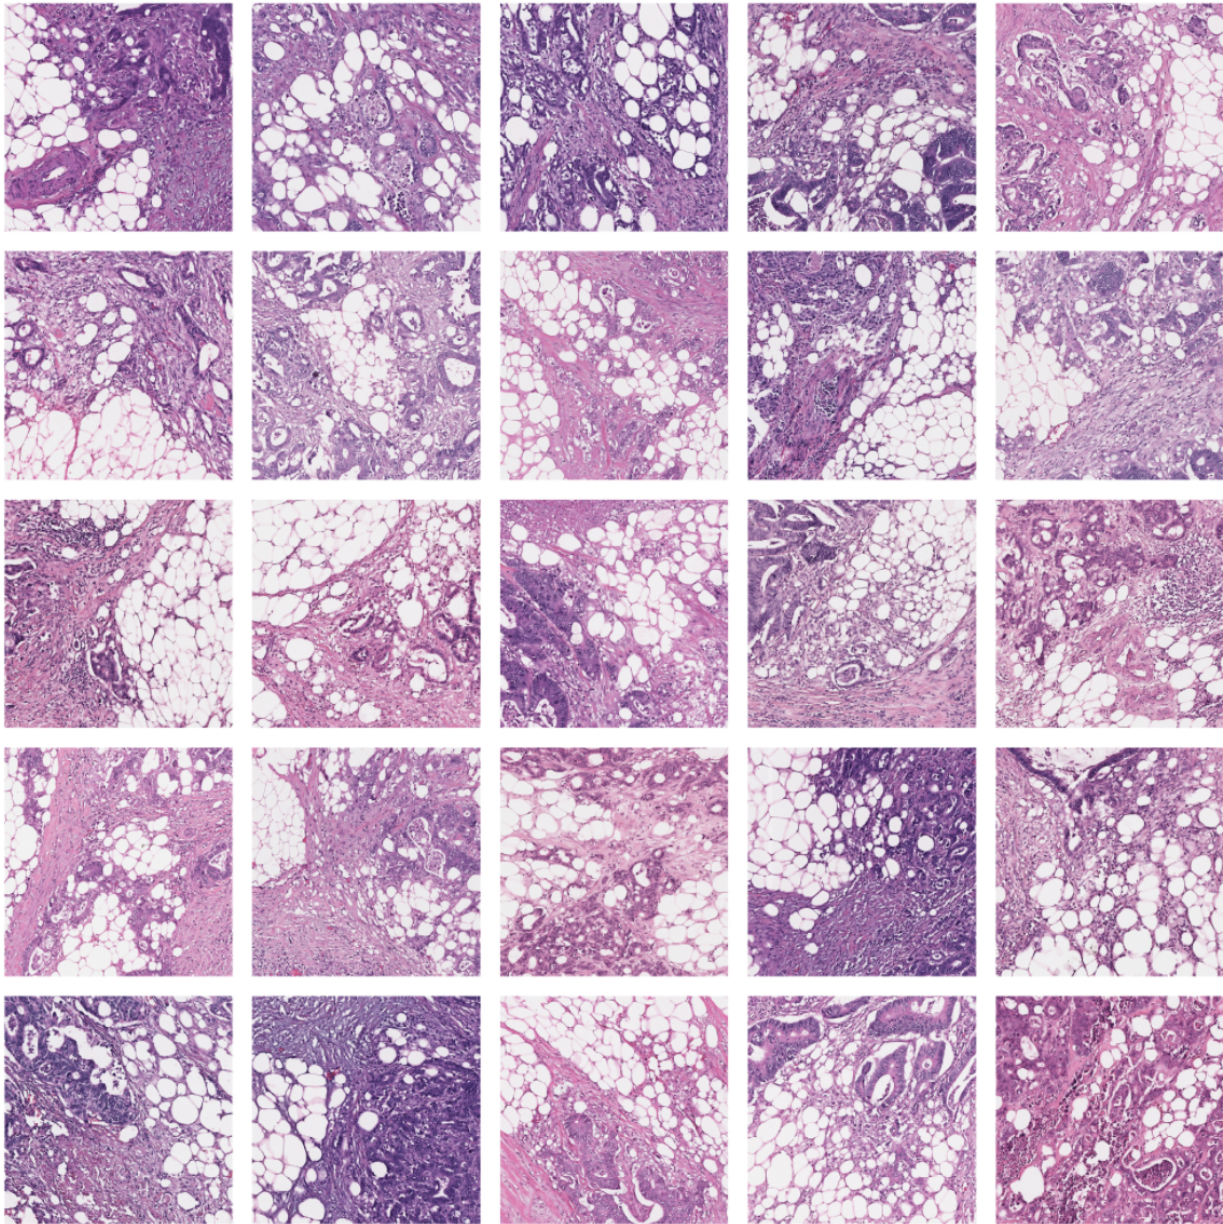

**Supplementary Figure 10. Sample patches of the TAF cluster (each from a unique case), but with the clustering centroids fit on validation set 2 and used to extract patches from validation set 1.**

## Supplementary Tables

**Supplementary Table 1. Clinical metadata distribution of the two validation sets.** P-values for differences in proportions were calculated via individual t-tests.

|                          |                 | Stage II         |                  |                        | Stage III        |                  |                        |
|--------------------------|-----------------|------------------|------------------|------------------------|------------------|------------------|------------------------|
|                          |                 | Validation set 1 | Validation set 2 | P-value for difference | Validation set 1 | Validation set 2 | P-value for difference |
| <b>T category</b>        | <b>T1/T2</b>    | 0 (0%)           | 0 (0%)           | N/A                    | 70 (11%)         | 42 (10%)         | 0.7083                 |
|                          | <b>T3</b>       | 546 (91%)        | 270 (82%)        | <b>0.0004</b>          | 439 (69%)        | 254 (62%)        | <b>0.0235</b>          |
|                          | <b>T4</b>       | 55 (9%)          | 58 (18%)         | <b>0.0004</b>          | 129 (20%)        | 114 (28%)        | <b>0.0055</b>          |
| <b>N category</b>        | <b>N0</b>       | 601 (100%)       | 328 (100%)       | N/A                    | 0 (0%)           | 0 (0%)           | N/A                    |
|                          | <b>N1</b>       | 0 (0%)           | 0 (0%)           | N/A                    | 361 (57%)        | 245 (60%)        | 0.3095                 |
|                          | <b>N2</b>       | 0 (0%)           | 0 (0%)           | N/A                    | 189 (30%)        | 158 (39%)        | <b>0.0032</b>          |
|                          | <b>N3</b>       | 0 (0%)           | 0 (0%)           | N/A                    | 88 (14%)         | 7 (2%)           | <b>0.0000</b>          |
| <b>R category</b>        | <b>R0</b>       | 588 (98%)        | 320 (98%)        | 0.7907                 | 606 (95%)        | 392 (96%)        | 0.6388                 |
|                          | <b>R1</b>       | 13 (2%)          | 8 (2%)           | 0.7907                 | 32 (5%)          | 18 (4%)          | 0.6388                 |
| <b>L category</b>        | <b>L0</b>       | 532 (89%)        | 272 (83%)        | <b>0.0231</b>          | 501 (79%)        | 274 (67%)        | <b>0.0000</b>          |
|                          | <b>L1</b>       | 69 (11%)         | 56 (17%)         | <b>0.0231</b>          | 137 (21%)        | 136 (33%)        | <b>0.0000</b>          |
| <b>V category</b>        | <b>V0</b>       | 580 (97%)        | 295 (90%)        | <b>0.0004</b>          | 583 (91%)        | 312 (76%)        | <b>0.0000</b>          |
|                          | <b>V1</b>       | 21 (3%)          | 33 (10%)         | <b>0.0004</b>          | 55 (9%)          | 98 (24%)         | <b>0.0000</b>          |
| <b>Tumor grade</b>       | <b>G1</b>       | 27 (4%)          | 23 (7%)          | 0.1264                 | 16 (3%)          | 17 (4%)          | 0.1598                 |
|                          | <b>G2</b>       | 464 (77%)        | 219 (67%)        | <b>0.0009</b>          | 428 (67%)        | 226 (55%)        | <b>0.0001</b>          |
|                          | <b>G3</b>       | 102 (17%)        | 80 (24%)         | <b>0.0089</b>          | 188 (29%)        | 155 (38%)        | <b>0.0056</b>          |
|                          | <b>GX</b>       | 8 (1%)           | 6 (2%)           | 0.5700                 | 6 (1%)           | 12 (3%)          | <b>0.0307</b>          |
| <b>Self-reported sex</b> | <b>Male</b>     | 340 (57%)        | 202 (62%)        | 0.1369                 | 339 (53%)        | 204 (50%)        | 0.2861                 |
|                          | <b>Female</b>   | 261 (43%)        | 126 (38%)        | 0.1369                 | 299 (47%)        | 206 (50%)        | 0.2861                 |
| Age at diagnosis         | <b>&lt;= 59</b> | 117 (19%)        | 43 (13%)         | <b>0.0102</b>          | 149 (23%)        | 90 (22%)         | 0.5960                 |
|                          | <b>60-69</b>    | 166 (28%)        | 83 (25%)         | 0.4433                 | 193 (30%)        | 99 (24%)         | <b>0.0290</b>          |
|                          | <b>70-79</b>    | 223 (37%)        | 116 (35%)        | 0.5982                 | 210 (33%)        | 120 (29%)        | 0.2120                 |
|                          | <b>&gt;= 80</b> | 95 (16%)         | 86 (26%)         | <b>0.0003</b>          | 86 (13%)         | 101 (25%)        | <b>0.0000</b>          |

**Supplementary Table 2. KM estimate of 5-year disease-specific survival in risk groups stratified by the deep learning system (DLS). Numbers in square brackets represent 95% confidence intervals.**

| Dataset          | Risk Group                      | Stage II             | Stage III            | Stage II/II          |
|------------------|---------------------------------|----------------------|----------------------|----------------------|
| Validation set 1 | High (top quartile)             | 72.84 [67.59, 77.38] | 41.45 [35.66, 47.13] | 53.33 [49.16, 57.32] |
|                  | Intermediate (middle quartiles) | 88.40 [82.75, 92.28] | 62.12 [55.98, 67.66] | 76.91 [72.81, 80.48] |
|                  | Low (bottom quartile)           | 89.03 [79.25, 94.36] | 76.32 [62.06, 85.81] | 86.12 [78.87, 91.03] |
| Validation set 2 | High (top quartile)             | 57.07 [44.05, 68.13] | 42.72 [32.25, 52.76] | 46.10 [38.28, 53.56] |
|                  | Intermediate (middle quartiles) | 77.76 [68.87, 84.40] | 52.82 [44.80, 60.21] | 64.83 [58.78, 70.22] |
|                  | Low (bottom quartile)           | 85.56 [78.29, 90.54] | 73.07 [64.79, 79.70] | 80.01 [74.66, 84.35] |

**Supplementary Table 3. Univariable Cox regression on the validation sets.** Numbers indicate hazard ratio followed by 95% confidence intervals in square brackets, and p-values (from a Wald test) after the comma. \*N/A because stage II only contains N0 and T3 or T4 and stage II only contains N1 by definition (American Joint Committee on Cancer, AJCC). Bold indicates statistically significant input variables ( $p < 0.05$ ).

| Variable                  |               | Stage II                            |                                     | Stage III                           |                                     | Stage II/III                        |                                     |
|---------------------------|---------------|-------------------------------------|-------------------------------------|-------------------------------------|-------------------------------------|-------------------------------------|-------------------------------------|
|                           |               | Validation set 1                    | Validation set 2                    | Validation set 1                    | Validation set 2                    | Validation set 1                    | Validation set 2                    |
| <b>DLS</b>                |               | <b>1.64 [1.40, 1.92], &lt;0.001</b> | <b>1.55 [1.25, 1.92], &lt;0.001</b> | <b>1.49 [1.33, 1.67], &lt;0.001</b> | <b>1.51 [1.32, 1.74], &lt;0.001</b> | <b>1.72 [1.57, 1.89], &lt;0.001</b> | <b>1.64 [1.47, 1.84], &lt;0.001</b> |
| <b>Age</b>                |               | 1.06 [0.91, 1.24], 0.446            | <b>1.49 [1.18, 1.87], &lt;0.001</b> | <b>1.11 [1.01, 1.22], 0.025</b>     | <b>1.24 [1.09, 1.41], 0.001</b>     | 1.06 [0.98, 1.15], 0.121            | <b>1.25 [1.12, 1.40], &lt;0.001</b> |
| <b>Sex</b>                | <b>Male</b>   | 1.0 (reference)                     |                                     |                                     |                                     |                                     |                                     |
|                           | <b>Female</b> | 0.78 [0.56, 1.07], 0.127            | 0.90 [0.57, 1.42], 0.653            | 0.79 [0.63, 0.98], 0.036            | 0.94 [0.70, 1.26], 0.682            | <b>0.80 [0.67, 0.97], 0.019</b>     | 1.01 [0.79, 1.29], 0.929            |
| <b>Grade</b>              | <b>G1</b>     | 1.0 (reference)                     |                                     |                                     |                                     |                                     |                                     |
|                           | <b>G2</b>     | 0.78 [0.38, 1.60], 0.503            | 1.67 [0.61, 4.62], 0.320            | 1.27 [0.56, 2.86], 0.563            | 3.06 [0.97, 9.65], 0.056            | 1.09 [0.64, 1.86], 0.754            | <b>2.36 [1.11, 5.03], 0.027</b>     |
|                           | <b>G3</b>     | 1.17 [0.54, 2.54], 0.682            | 1.49 [0.51, 4.42], 0.467            | 1.89 [0.83, 4.31], 0.128            | <b>3.74 [1.18, 11.87], 0.025</b>    | <b>1.81 [1.05, 3.14], 0.034</b>     | <b>2.94 [1.36, 6.33], 0.006</b>     |
|                           | <b>GX</b>     | 0.90 [0.19, 4.22], 0.889            | 2.38 [0.44, 13.00], 0.317           | 0.90 [0.18, 4.47], 0.899            | 2.92 [0.70, 12.21], 0.143           | 0.93 [0.31, 2.83], 0.902            | 2.75 [0.96, 7.84], 0.059            |
| <b>Lymphatic Invasion</b> | <b>L0</b>     | 1.0 (reference)                     |                                     |                                     |                                     |                                     |                                     |
|                           | <b>L1</b>     | <b>1.71 [1.12, 2.61], 0.012</b>     | 1.02 [0.57, 1.81], 0.956            | 0.81 [0.61, 1.07], 0.138            | 1.23 [0.91, 1.66], 0.186            | 1.17 [0.92, 1.47], 0.199            | <b>1.35 [1.04, 1.75], 0.026</b>     |
| <b>N-category</b>         | <b>N0</b>     | N/A*                                |                                     |                                     |                                     | 1.0 (reference)                     |                                     |
|                           | <b>N1</b>     | N/A*                                |                                     | 1.0 (reference)                     |                                     | <b>2.16 [1.73, 2.69], 0.001</b>     | <b>1.73 [1.28, 2.33], 0.001</b>     |
|                           | <b>N2</b>     | N/A*                                |                                     | <b>1.29 [1.00, 1.65], 0.046</b>     | <b>1.78 [1.33, 2.38], 0.001</b>     | <b>2.78 [2.16, 3.57], 0.001</b>     | <b>3.09 [2.28, 4.19], 0.001</b>     |
|                           | <b>N3</b>     | N/A*                                |                                     | 1.29 [0.93, 1.79], 0.129            | 0.70 [0.17, 2.83], 0.615            | <b>2.79 [2.00, 3.89], 0.001</b>     | <b>1.21 [0.30, 4.91], 0.793</b>     |
| <b>Margin Status</b>      | <b>R0</b>     | 1.0 (reference)                     |                                     |                                     |                                     |                                     |                                     |
|                           | <b>R1</b>     | 1.19 [0.44, 3.21], 0.732            | 1.84 [0.58, 5.83], 0.301            | 1.44 [0.89, 2.31], 0.136            | 1.04 [0.51, 2.11], 0.921            | <b>1.56 [1.01, 2.39], 0.043</b>     | 1.32 [0.72, 2.42], 0.365            |
| <b>Margin Status</b>      | <b>T1/T2</b>  | N/A*                                |                                     | 1.0 (reference)                     |                                     |                                     |                                     |
|                           | <b>T3</b>     | 1.0 (reference)                     |                                     | <b>1.67 [1.09, 2.55], 0.017</b>     | <b>2.81 [1.31, 6.06], 0.008</b>     | 1.06 [0.70, 1.61], 0.770            | 2.02 [0.95, 4.32], 0.068            |
|                           | <b>T4</b>     | <b>1.68 [1.06, 2.66], 0.027</b>     | <b>1.93 [1.16, 3.20], 0.011</b>     | <b>2.37 [1.50, 3.75], 0.001</b>     | <b>6.42 [2.96, 13.94], 0.001</b>    | <b>1.90 [1.22, 2.97], 0.005</b>     | <b>4.95 [2.30, 10.66], 0.001</b>    |
| <b>Venous Invasion</b>    | <b>V0</b>     | 1.0 (reference)                     |                                     |                                     |                                     |                                     |                                     |
|                           | <b>V1</b>     | 1.76 [0.90, 3.46], 0.099            | 1.43 [0.74, 2.77], 0.292            | 0.92 [0.61, 1.38], 0.671            | <b>1.63 [1.19, 2.25], 0.003</b>     | 1.26 [0.89, 1.78], 0.199            | <b>1.83 [1.38, 2.43], 0.001</b>     |

**Supplementary Table 4. (A) 5-year AUC for the deep learning system (DLS) and Cox regression models fit on the clinical metadata, and Cox models fit on both; (B) a similar table for the tumor-adipose feature (TAF) quantitation.** Numbers in square brackets represent 95% confidence intervals.

**A**

| Dataset          | Stage        | DLS                  | Clinical             | Clinical + DLS       | Delta                 |
|------------------|--------------|----------------------|----------------------|----------------------|-----------------------|
| Validation set 1 | Stage II     | 0.680 [0.631, 0.739] | 0.539 [0.485, 0.610] | 0.659 [0.612, 0.716] | 0.120 [0.076, 0.188]  |
|                  | Stage III    | 0.655 [0.617, 0.694] | 0.597 [0.550, 0.645] | 0.662 [0.631, 0.709] | 0.065 [0.026, 0.108]  |
|                  | Stage II/III | 0.698 [0.660, 0.729] | 0.678 [0.642, 0.705] | 0.733 [0.697, 0.759] | 0.055 [0.036, 0.074]  |
| Validation set 2 | Stage II     | 0.663 [0.592, 0.730] | 0.610 [0.544, 0.657] | 0.695 [0.629, 0.746] | 0.085 [0.036, 0.150]  |
|                  | Stage III    | 0.655 [0.600, 0.707] | 0.664 [0.606, 0.720] | 0.686 [0.624, 0.736] | 0.022 [-0.022, 0.070] |
|                  | Stage II/III | 0.686 [0.638, 0.723] | 0.684 [0.639, 0.716] | 0.721 [0.688, 0.753] | 0.038 [0.006, 0.064]  |

**B**

| Dataset          | Stage        | TAF                  | Clinical             | Clinical + TAF       | Delta                 |
|------------------|--------------|----------------------|----------------------|----------------------|-----------------------|
| Validation set 1 | Stage II     | 0.645 [0.598, 0.700] | 0.539 [0.485, 0.610] | 0.595 [0.543, 0.663] | 0.056 [0.034, 0.082]  |
|                  | Stage III    | 0.629 [0.593, 0.680] | 0.597 [0.550, 0.645] | 0.625 [0.587, 0.676] | 0.029 [0.012, 0.047]  |
|                  | Stage II/III | 0.666 [0.634, 0.697] | 0.678 [0.642, 0.705] | 0.698 [0.664, 0.723] | 0.020 [0.010, 0.029]  |
| Validation set 2 | Stage II     | 0.634 [0.570, 0.697] | 0.610 [0.544, 0.657] | 0.620 [0.555, 0.661] | 0.010 [-0.016, 0.036] |
|                  | Stage III    | 0.682 [0.638, 0.743] | 0.664 [0.606, 0.720] | 0.689 [0.630, 0.743] | 0.025 [0.004, 0.045]  |
|                  | Stage II/III | 0.682 [0.641, 0.734] | 0.684 [0.639, 0.716] | 0.699 [0.653, 0.734] | 0.015 [0.006, 0.023]  |

**Supplementary Table 5. C-index for the deep learning system (DLS) and Cox regression models fit on the clinical metadata, and Cox models fit on both.** Numbers in square brackets represent 95% confidence intervals.

| Dataset          | Stage        | DLS                  | Clinical             | Clinical + DLS       | Delta                 |
|------------------|--------------|----------------------|----------------------|----------------------|-----------------------|
| Validation set 1 | Stage II     | 0.651 [0.615, 0.703] | 0.535 [0.493, 0.596] | 0.634 [0.597, 0.680] | 0.099 [0.070, 0.143]  |
|                  | Stage III    | 0.626 [0.601, 0.655] | 0.576 [0.542, 0.613] | 0.626 [0.602, 0.654] | 0.050 [0.030, 0.082]  |
|                  | Stage II/III | 0.663 [0.636, 0.686] | 0.640 [0.608, 0.664] | 0.685 [0.658, 0.704] | 0.045 [0.031, 0.060]  |
| Validation set 2 | Stage II     | 0.628 [0.568, 0.687] | 0.600 [0.554, 0.653] | 0.658 [0.607, 0.704] | 0.058 [0.015, 0.103]  |
|                  | Stage III    | 0.639 [0.597, 0.678] | 0.631 [0.591, 0.680] | 0.653 [0.609, 0.690] | 0.022 [-0.018, 0.060] |
|                  | Stage II/III | 0.660 [0.624, 0.694] | 0.661 [0.625, 0.688] | 0.689 [0.659, 0.721] | 0.028 [0.008, 0.050]  |



**Supplementary Table 6. (A) 5-year AUC in T3 cases for the deep learning system (DLS) and Cox regression models fit on the clinical metadata, and Cox models fit on both. (B) a similar table for the tumor-adipose feature (TAF) quantitation.** Numbers in square brackets represent 95% confidence intervals.

**A**

| Dataset                       | Stage        | DLS                  | Clinical             | Clinical + DLS       | Delta                 |
|-------------------------------|--------------|----------------------|----------------------|----------------------|-----------------------|
| Validation set 1<br>(T3 only) | Stage II     | 0.677 [0.616, 0.739] | 0.537 [0.470, 0.598] | 0.657 [0.604, 0.714] | 0.121 [0.064, 0.179]  |
|                               | Stage III    | 0.639 [0.581, 0.684] | 0.563 [0.515, 0.620] | 0.654 [0.599, 0.708] | 0.091 [0.025, 0.129]  |
|                               | Stage II/III | 0.697 [0.661, 0.739] | 0.668 [0.629, 0.694] | 0.733 [0.698, 0.770] | 0.065 [0.047, 0.087]  |
| Validation set 2<br>(T3 only) | Stage II     | 0.642 [0.567, 0.729] | 0.585 [0.502, 0.680] | 0.679 [0.596, 0.766] | 0.094 [0.037, 0.175]  |
|                               | Stage III    | 0.629 [0.559, 0.690] | 0.590 [0.515, 0.662] | 0.641 [0.561, 0.702] | 0.051 [-0.002, 0.116] |
|                               | Stage II/III | 0.654 [0.598, 0.701] | 0.641 [0.578, 0.702] | 0.685 [0.632, 0.732] | 0.044 [0.004, 0.080]  |

**B**

| Dataset                       | Stage        | TAF                  | Clinical             | Clinical + TAF       | Delta                 |
|-------------------------------|--------------|----------------------|----------------------|----------------------|-----------------------|
| Validation set 1<br>(T3 only) | Stage II     | 0.645 [0.590, 0.691] | 0.537 [0.470, 0.598] | 0.592 [0.526, 0.651] | 0.055 [0.032, 0.092]  |
|                               | Stage III    | 0.618 [0.558, 0.675] | 0.563 [0.515, 0.620] | 0.602 [0.555, 0.656] | 0.038 [0.009, 0.059]  |
|                               | Stage II/III | 0.668 [0.634, 0.703] | 0.668 [0.629, 0.694] | 0.692 [0.659, 0.720] | 0.025 [0.017, 0.035]  |
| Validation set 2<br>(T3 only) | Stage II     | 0.604 [0.530, 0.712] | 0.585 [0.502, 0.680] | 0.600 [0.512, 0.692] | 0.015 [-0.015, 0.056] |
|                               | Stage III    | 0.653 [0.576, 0.714] | 0.590 [0.515, 0.662] | 0.633 [0.564, 0.709] | 0.043 [0.022, 0.070]  |
|                               | Stage II/III | 0.649 [0.599, 0.707] | 0.641 [0.578, 0.702] | 0.666 [0.612, 0.721] | 0.025 [0.011, 0.039]  |

**Supplementary Table 7. Spearman correlation between clinicopathologic features and (A) the deep learning system (DLS) or (B) automatic quantitation of the tumor-adipose feature. P-values (from a t-test) are shown in parentheses. Cells with a p-value below 0.05 are bolded. Abbreviations for L/N/R/T/V/G are defined in the “Data Cohorts” section of Methods.**

**A**

| Dataset          | Stage        | T                                 | N                                 | R                                 | L                                 | V                                 | G                                 | Sex              | Age                            |
|------------------|--------------|-----------------------------------|-----------------------------------|-----------------------------------|-----------------------------------|-----------------------------------|-----------------------------------|------------------|--------------------------------|
| Validation set 1 | Stage II     | 0.07<br>(0.080)                   | N/A                               | -0.08<br>(0.057)                  | 0.07<br>(0.084)                   | 0.02<br>(0.684)                   | <b>0.13</b><br><b>(0.002)</b>     | 0.0<br>(0.928)   | <b>-0.09</b><br><b>(0.024)</b> |
|                  | Stage III    | <b>0.27</b><br><b>(&lt;0.001)</b> | <b>0.22</b><br><b>(&lt;0.001)</b> | <b>0.14</b><br><b>(&lt;0.001)</b> | -0.06<br>(0.141)                  | <b>0.11</b><br><b>(0.006)</b>     | <b>0.23</b><br><b>(&lt;0.001)</b> | 0.03<br>(0.421)  | -0.07<br>(0.067)               |
|                  | Stage II/III | <b>0.18</b><br><b>(&lt;0.001)</b> | <b>0.36</b><br><b>(&lt;0.001)</b> | <b>0.07</b><br><b>(0.009)</b>     | 0.04<br>(0.179)                   | <b>0.10</b><br><b>(&lt;0.001)</b> | <b>0.22</b><br><b>(&lt;0.001)</b> | 0.03<br>(0.322)  | <b>-0.10</b><br><b>(0.001)</b> |
| Validation set 2 | Stage II     | <b>0.18</b><br><b>(0.001)</b>     | N/A                               | 0.11<br>(0.054)                   | 0.09<br>(0.093)                   | <b>0.14</b><br><b>(0.010)</b>     | <b>0.17</b><br><b>(0.003)</b>     | 0.07<br>(0.183)  | 0.04<br>(0.517)                |
|                  | Stage III    | <b>0.27</b><br><b>(&lt;0.001)</b> | <b>0.19</b><br><b>(&lt;0.001)</b> | <b>0.10</b><br><b>(0.038)</b>     | <b>0.13</b><br><b>(0.008)</b>     | <b>0.16</b><br><b>(0.001)</b>     | <b>0.17</b><br><b>(0.001)</b>     | -0.01<br>(0.791) | -0.04<br>(0.433)               |
|                  | Stage II/III | <b>0.24</b><br><b>(&lt;0.001)</b> | <b>0.34</b><br><b>(&lt;0.001)</b> | <b>0.12</b><br><b>(0.001)</b>     | <b>0.17</b><br><b>(&lt;0.001)</b> | <b>0.21</b><br><b>(&lt;0.001)</b> | <b>0.20</b><br><b>(&lt;0.001)</b> | 0.06<br>(0.115)  | -0.04<br>(0.339)               |

**B**

| Dataset          | Stage        | T                             | N                             | R                             | L                             | V                             | G                             | Sex              | Age              |
|------------------|--------------|-------------------------------|-------------------------------|-------------------------------|-------------------------------|-------------------------------|-------------------------------|------------------|------------------|
| Validation set 1 | Stage II     | <b>0.12</b><br><b>(0.003)</b> | N/A                           | 0.01<br>(0.890)               | 0.04<br>(0.371)               | -0.00<br>(0.986)              | <b>0.15</b><br><b>(0.000)</b> | -0.02<br>(0.617) | -0.00<br>(0.974) |
|                  | Stage III    | <b>0.36</b><br><b>(0.000)</b> | <b>0.13</b><br><b>(0.001)</b> | <b>0.12</b><br><b>(0.003)</b> | 0.02<br>(0.573)               | <b>0.16</b><br><b>(0.000)</b> | <b>0.16</b><br><b>(0.000)</b> | -0.03<br>(0.413) | 0.05<br>(0.230)  |
|                  | Stage II/III | <b>0.27</b><br><b>(0.000)</b> | <b>0.28</b><br><b>(0.000)</b> | <b>0.09</b><br><b>(0.002)</b> | <b>0.06</b><br><b>(0.024)</b> | <b>0.12</b><br><b>(0.000)</b> | <b>0.18</b><br><b>(0.000)</b> | -0.02<br>(0.513) | 0.01<br>(0.785)  |
| Validation set 2 | Stage II     | <b>0.17</b><br><b>(0.002)</b> | N/A                           | <b>0.16</b><br><b>(0.005)</b> | 0.03<br>(0.611)               | <b>0.12</b><br><b>(0.025)</b> | 0.05<br>(0.384)               | -0.14<br>(0.012) | 0.05<br>(0.357)  |
|                  | Stage III    | <b>0.46</b><br><b>(0.000)</b> | <b>0.17</b><br><b>(0.000)</b> | 0.08<br>(0.093)               | <b>0.14</b><br><b>(0.005)</b> | <b>0.20</b><br><b>(0.000)</b> | 0.03<br>(0.591)               | -0.07<br>(0.161) | 0.05<br>(0.278)  |
|                  | Stage II/III | <b>0.37</b><br><b>(0.000)</b> | <b>0.23</b><br><b>(0.000)</b> | <b>0.12</b><br><b>(0.001)</b> | <b>0.13</b><br><b>(0.000)</b> | <b>0.20</b><br><b>(0.000)</b> | <b>0.07</b><br><b>(0.072)</b> | -0.07<br>(0.053) | 0.04<br>(0.282)  |

**Supplementary Table 8. Hyperparameter search space and optimal hyperparameters for the tumor segmentation model.** We used random search (n=50 configurations) and selected the best model checkpoint based on the tuning set 5-year AUC.

| Hyperparameter                        | Description                                                                                                                    | Values                    | Optimal configuration |
|---------------------------------------|--------------------------------------------------------------------------------------------------------------------------------|---------------------------|-----------------------|
| Batch size                            | Number of examples in each training batch                                                                                      | 64                        | 64                    |
| Patch size                            | Height and width of each image patch                                                                                           | 299                       | 299                   |
| Magnification                         | Image magnification at which the patches are extracted                                                                         | 20X, 10X, 5X, 2.5X, 1.25X | 5X                    |
| Neural network architecture           | Convolutional neural network architecture                                                                                      | InceptionV3               | InceptionV3           |
| Depth Multiplier                      | Multiplier on the depth of each convolution layer for downscaling the number of parameters in the default network architecture | 0.05, 0.1, 0.15, 0.2      | 0.1                   |
| Loss                                  | Loss function used for training                                                                                                | Softmax cross-entropy     | Softmax cross-entropy |
| Optimizer                             | The optimization algorithm used for model training                                                                             | RMSProp                   | RMSProp               |
| L2 regularization weight              | Weight of the L2 loss used for regularization                                                                                  | 0.001, 0.0001, 0.00001    | 0.0001                |
| Initial learning rate                 | Initial learning rate used for the RMSPROP optimizer; decay rate was 0.99 every 20,000 steps                                   | 0.005, 0.0005, 0.00005    | 0.005                 |
| Learning rate decay steps             | Number of steps after which the learning rate is decreased by multiplying by the decay rate                                    | 10000, 20000              | 10000                 |
| Learning rate decay rate              | The rate at which the learning rate is decayed after a fixed number of steps                                                   | 0.95, 0.99                | 0.99                  |
| Exponential moving average decay rate | Decay rate used for taking an exponential moving average of the model weights for evaluation                                   | None, 0.999, 0.9999       | 0.999                 |
| Training steps                        | The number of steps for which the model is trained                                                                             | 2000000                   | 2000000               |
| Evaluation steps                      | The number of train steps after which the model is evaluated                                                                   | 10000                     | 10000                 |

**Supplementary Table 9. Tumor segmentation model performance on its test split at three different thresholds.** Thresholds were chosen based on the recall observed on the tune split. AUC was 98.50.

| <b>Threshold</b>    | <b>Recall</b> | <b>Precision</b> | <b>Intersection over union</b> |
|---------------------|---------------|------------------|--------------------------------|
| 95% tune set recall | 97.58         | 83.38            | 93.63                          |
| 90% tune set recall | 93.99         | 88.58            | 94.72                          |
| 75% tune set recall | 81.42         | 93.81            | 93.02                          |

**Supplementary Table 10. Hyperparameter search space and optimal hyperparameters for the prognostic model. (A)** We used random search (n=100 configurations across the search space and selected the best model checkpoint based on the tuning set 5-year AUC. **(B)** The final DLS predictions were generated by ensembling the top 5 models.

**A**

| Hyperparameter                        | Description                                                                                              | Value                  |
|---------------------------------------|----------------------------------------------------------------------------------------------------------|------------------------|
| Batch size*                           | Number of examples in each training batch.                                                               | 64                     |
| Patch size*                           | Height and width of each image patch.                                                                    | 256                    |
| Patch set size*                       | Number of patches sampled from a case to form a single training example:                                 | 16                     |
| Magnification                         | Image magnification at which the patches are extracted                                                   | 20X, 10X, 5X, 2.5X     |
| ROI model recall                      | The recall for tumor detection. Recall of 100 corresponds to using a tissue mask instead of an ROI mask. | 100, 95, 90, 75        |
| ROI region dilation                   | The number of superpixels by which the ROI mask is dilated                                               | 0, 4, 16               |
| Number of layers                      | Number of layers used in our MobileNet-based architecture                                                | 4, 8                   |
| Base depth                            | Depth of the first convolution layer in the network                                                      | 8, 16, 32              |
| Depth growth rate                     | The rate at which depth grows after each stride 2 layer.                                                 | 1.25, 1.5, 2.0         |
| Max depth                             | The maximum depth of any layer in the network                                                            | 64, 256                |
| Loss                                  | Survival loss function used for training.                                                                | Cox partial likelihood |
| Optimizer                             | The optimization algorithm used for model training.                                                      | Adam                   |
| L2 regularization weight              | Weight of the L2 loss used for regularization                                                            | 0.001, 0.0001, 0.00001 |
| Initial Learning rate                 | Initial learning rate used for the RMSPROP optimizer; decay rate was 0.99 every 20,000 steps.            | 0.005, 0.0005, 0.00005 |
| Learning rate decay steps             | Number of steps after which the learning rate is decreased by multiplying by the decay rate.             | 10000, 20000           |
| Learning rate decay rate              | The rate at which the learning rate is decayed after a fixed number of steps.                            | 0.95, 0.99             |
| Exponential moving average decay rate | Decay rate used for taking an exponential moving average of the model weights for evaluation.            | None, 0.999, 0.9999    |
| Training steps                        | The number of steps for which the model is trained.                                                      | 2000000                |
| Evaluation steps                      | The number of train steps after which the model is evaluated.                                            | 10000                  |

\* These parameters were chosen based on preliminary tuning experiments. The best values from these experiments were chosen for the full hyper-parameter tuning run described here.

**B**

| <b>Hyperparameter</b>                 | <b>Model 1</b> | <b>Model 2</b> | <b>Model 3</b> | <b>Model 4</b> | <b>Model 5</b> |
|---------------------------------------|----------------|----------------|----------------|----------------|----------------|
| Magnification                         | 5X             | 5X             | 5X             | 5X             | 5X             |
| ROI model recall                      | 90             | 90             | 90             | 90             | 95             |
| ROI region dilation                   | 16             | 4              | 4              | 4              | 16             |
| Number of layers                      | 8              | 4              | 4              | 8              | 8              |
| Base depth                            | 32             | 32             | 32             | 8              | 32             |
| Depth growth rate                     | 1.5            | 1.25           | 1.5            | 1.25           | 1.25           |
| Max depth                             | 256            | 64             | 64             | 256            | 256            |
| L2 Regularization                     | 1e-05          | 0.001          | 1e-05          | 0.001          | 0.001          |
| Initial learning rate                 | 0.0005         | 0.0005         | 0.0005         | 0.0005         | 5e-05          |
| Learning rate decay steps             | 10000          | 10000          | 10000          | 20000          | 20000          |
| Learning rate decay rate              | 0.95           | 0.95           | 0.95           | 0.95           | 0.95           |
| Exponential moving average decay rate | 0.9999         | 0.9999         | 0.9999         | N/A            | 0.999          |
| Training step                         | 1381426        | 1403469        | 1907329        | 1714445        | 1259927        |

**Supplementary Table 11. REMARK checklist for reporting.**

| Item to be reported                                                                                                                                                                                                                                                                                                                        | Location                                                                                                                                   |
|--------------------------------------------------------------------------------------------------------------------------------------------------------------------------------------------------------------------------------------------------------------------------------------------------------------------------------------------|--------------------------------------------------------------------------------------------------------------------------------------------|
| <b>INTRODUCTION</b>                                                                                                                                                                                                                                                                                                                        |                                                                                                                                            |
| 1 State the marker examined, the study objectives, and any pre-specified hypotheses.                                                                                                                                                                                                                                                       | Last paragraph of introduction                                                                                                             |
| <b>MATERIALS AND METHODS</b>                                                                                                                                                                                                                                                                                                               |                                                                                                                                            |
| <i>Patients</i>                                                                                                                                                                                                                                                                                                                            |                                                                                                                                            |
| 2 Describe the characteristics (e.g., disease stage or co-morbidities) of the study patients, including their source and inclusion and exclusion criteria.                                                                                                                                                                                 | "Data Cohorts" section                                                                                                                     |
| 3 Describe treatments received and how chosen (e.g., randomized or rule-based).                                                                                                                                                                                                                                                            | "Data Cohorts" section                                                                                                                     |
| <i>Specimen characteristics</i>                                                                                                                                                                                                                                                                                                            |                                                                                                                                            |
| 4 Describe type of biological material used (including control samples) and methods of preservation and storage.                                                                                                                                                                                                                           | "Data Cohorts" section                                                                                                                     |
| <i>Assay methods</i>                                                                                                                                                                                                                                                                                                                       |                                                                                                                                            |
| 5 Specify the assay method used and provide (or reference) a detailed protocol, including specific reagents or kits used, quality control procedures, reproducibility assessments, quantitation methods, and scoring and reporting protocols. Specify whether and how assays were performed blinded to the study endpoint.                 | "Data Cohorts" and "Prognostic Model Neural Network Architecture and Survival Loss" sections                                               |
| <i>Study design</i>                                                                                                                                                                                                                                                                                                                        |                                                                                                                                            |
| 6 State the method of case selection, including whether prospective or retrospective and whether stratification or matching (e.g., by stage of disease or age) was used. Specify the time period from which cases were taken, the end of the follow-up period, and the median follow-up time.                                              | "Data Cohorts" section                                                                                                                     |
| 7 Precisely define all clinical endpoints examined.                                                                                                                                                                                                                                                                                        | "Data Cohorts" section                                                                                                                     |
| 8 List all candidate variables initially examined or considered for inclusion in models.                                                                                                                                                                                                                                                   | "Data Cohorts" and "DLS Association with Clinicopathologic Features" section, Table 4                                                      |
| 9 Give rationale for sample size; if the study was designed to detect a specified effect size, give the target power and effect size.                                                                                                                                                                                                      | "Data Cohorts" section                                                                                                                     |
| <i>Statistical analysis methods</i>                                                                                                                                                                                                                                                                                                        |                                                                                                                                            |
| 10 Specify all statistical methods, including details of any variable selection procedures and other model-building issues, how model assumptions were verified, and how missing data were handled.                                                                                                                                        | "Tumor Segmentation Model", "Prognostic Model Neural Network Architecture and Survival Loss", and "Understanding DLS Predictions" sections |
| 11 Clarify how marker values were handled in the analyses; if relevant, describe methods used for cutpoint determination.                                                                                                                                                                                                                  | "Evaluating DLS Performance" section                                                                                                       |
| <b>RESULTS</b>                                                                                                                                                                                                                                                                                                                             |                                                                                                                                            |
| <i>Data</i>                                                                                                                                                                                                                                                                                                                                |                                                                                                                                            |
| 12 Describe the flow of patients through the study, including the number of patients included in each stage of the analysis (a diagram may be helpful) and reasons for dropout. Specifically, both overall and for each subgroup extensively examined report the numbers of patients and the number of events.                             | Table 1, Supplementary Figure 1                                                                                                            |
| 13 Report distributions of basic demographic characteristics (at least age and sex), standard (disease-specific) prognostic variables, and tumor marker, including numbers of missing values.                                                                                                                                              | Supplementary Table 1                                                                                                                      |
| <i>Analysis and presentation</i>                                                                                                                                                                                                                                                                                                           |                                                                                                                                            |
| 14 Show the relation of the marker to standard prognostic variables.                                                                                                                                                                                                                                                                       | Supplementary Tables 4 and 7                                                                                                               |
| 15 Present univariable analyses showing the relation between the marker and outcome, with the estimated effect (e.g., hazard ratio and survival probability). Preferably provide similar analyses for all other variables being analyzed. For the effect of a tumor marker on a time-to-event outcome, a Kaplan-Meier plot is recommended. | P5<br>Supplementary Table 3                                                                                                                |
| 16 For key multivariable analyses, report estimated effects (e.g., hazard ratio) with confidence intervals for the marker and, at least for the final model, all other variables in the model.                                                                                                                                             | Table 3                                                                                                                                    |

|                   |                                                                                                                                                                                                                |                                       |
|-------------------|----------------------------------------------------------------------------------------------------------------------------------------------------------------------------------------------------------------|---------------------------------------|
| 17                | Among reported results, provide estimated effects with confidence intervals from an analysis in which the marker and standard prognostic variables are included, regardless of their statistical significance. | Table 3, Supplementary Tables 4 and 5 |
| 18                | If done, report results of further investigations, such as checking assumptions, sensitivity analyses, and internal validation.                                                                                | Tables 4,5                            |
| <b>DISCUSSION</b> |                                                                                                                                                                                                                |                                       |
| 19                | Interpret the results in the context of the pre-specified hypotheses and other relevant studies; include a discussion of limitations of the study.                                                             | Throughout Discussion                 |
| 20                | Discuss implications for future research and clinical value.                                                                                                                                                   | Throughout Discussion                 |
